# Supplementary material
Source: Springer Nature journal article supplement (https://www.springermedizin.de/resource/supplementary/13023_2006_24_MOESM2_ESM.pdf/9641476)

Figure 2: clinical status of patient 3 before and after 4 meloxicam treatment cycles

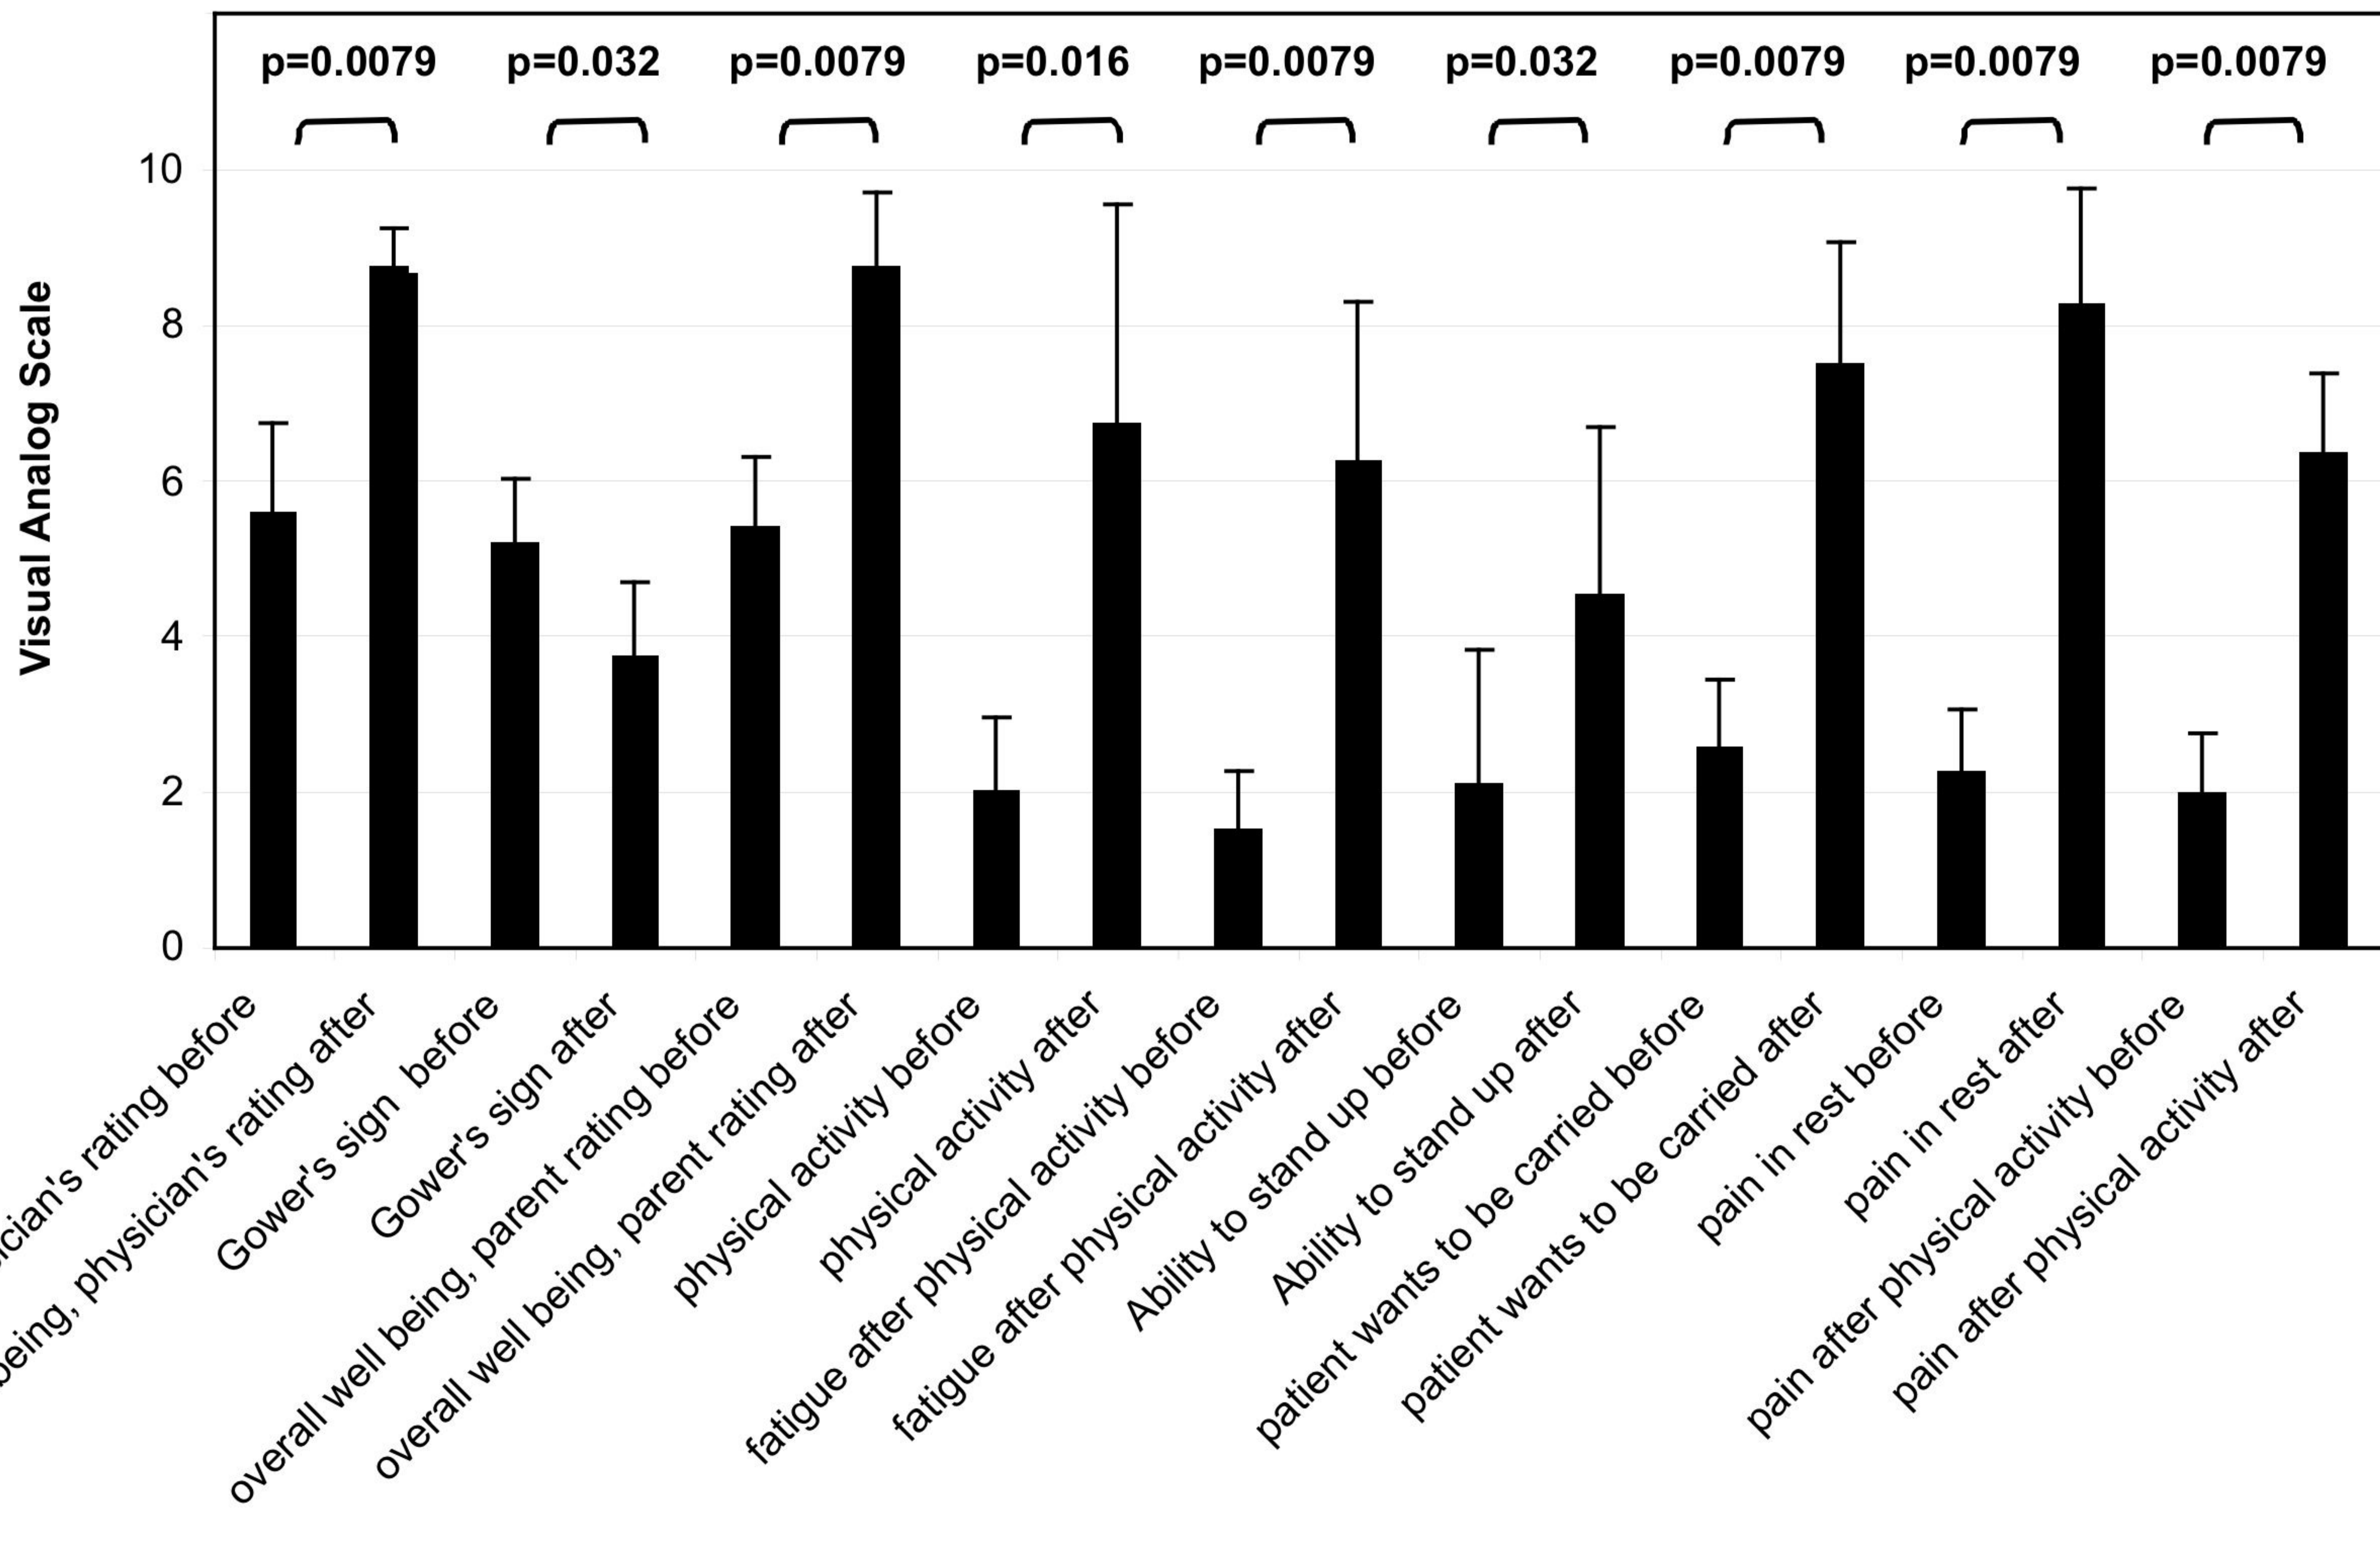

Supplement: MOESM2 [file 9641476]
